# Supplementary material
Source: HighWire-hosted journal article supplement (http://dmd.aspetjournals.org/highwire/filestream/66315/field_highwire_adjunct_files/0/DMD_Supporting_Information_55632.pdf)
Supplement: DMD_Supporting_Information_55632.pdf [file DMD_Supporting_Information_55632.pdf]

## **Supporting Information**

Drug Metabolism and Disposition

**Simultaneous Quantification of the Abundance of Several Cytochrome P450 and Uridine 5'-Diphospho-Glucuronosyltransferase Enzymes in Human Liver Microsomes Using Multiplexed Targeted Proteomics.**

Brahim Achour, Matthew R Russell, Jill Barber, Amin Rostami-Hodjegan

### **Cytochrome P450 liver enzyme pie chart**

The P450 enzyme abundances obtained in this study were used to generate a pie chart of hepatic drug-metabolizing cytochrome P450 enzyme expression. In our study, two major enzymes (CYP2E1 and CYP2C9) were not quantified and the abundances of these enzymes were quoted from a meta-analysis carried out by Rowland-Yeo et al. (2004).

Pie charts of liver P450 enzyme abundances from this study, from Rowland-Yeo et al. (2004) and from Shimada et al. (1994) are shown in Supplementary Figure 1.

### **UGT liver enzyme pie chart**

The UGT enzyme abundances obtained in this study were used to generate a pie chart of drug-metabolizing UGT enzyme expression in the liver. The pie chart for liver UGT enzyme abundances from this study is shown in Supplementary Figure 2.

### The present study

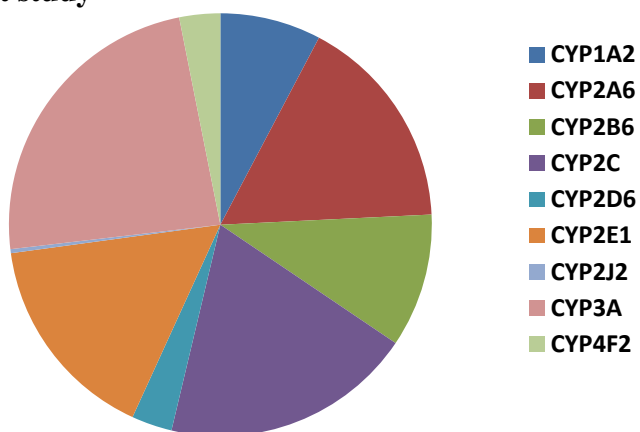

### Rowland-Yeo et al., 2004

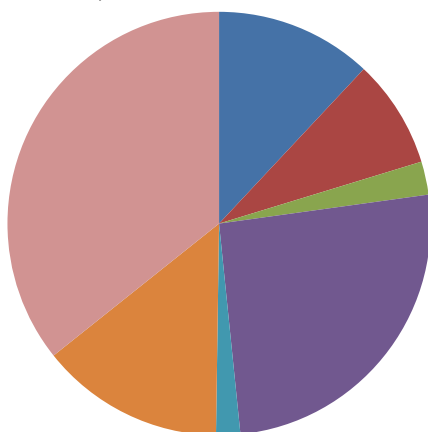

### Shimada et al., 1994

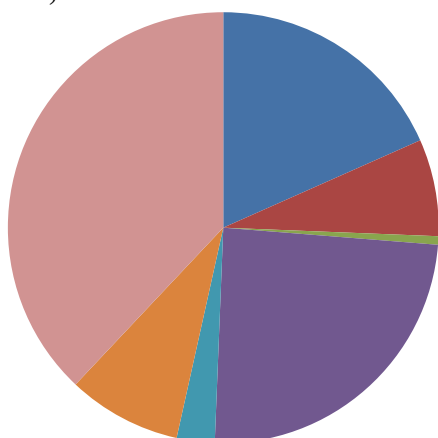

Supplementary Figure 1. Pie charts of drug-metabolizing P450 enzyme abundances in the liver based on data from the present study and from two previous studies (Rowland-Yeo et al. and Shimada et al.). Higher relative abundance of CYP2B6 and lower relative abundance of CYP3A are observed in the present study. Two additional enzymes (CYP2J2 and CYP4F2) are added to the chart.

### The present study

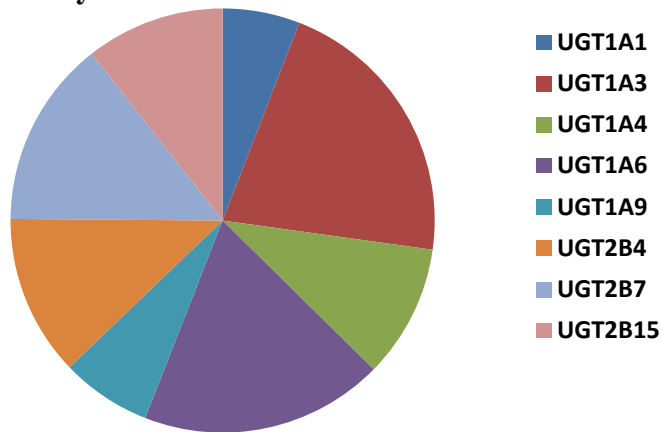

Supplementary Figure 2. Pie chart of drug-metabolizing UGT enzyme abundances in the liver using data from the present study.

### Transitions for the quantification of the P450 and UGT surrogate peptides

Supplementary Table 1 shows details about the peptides used for the quantification of the 25 P450 and UGT enzymes, including sequences, transitions and collision energies (CE).

Supplementary Table 1. Sequences, transitions and collision energies of the P450 and UGT surrogate peptides.

| Protein  | Peptide sequence     | Fragment ion | H or L | m/z (parent → fragment) |             | CE         |      |
|----------|----------------------|--------------|--------|-------------------------|-------------|------------|------|
| CYP1A2   | YLPNPALQR            | y7           | L      | 536.300915              | 795.447162  | 19.1       |      |
|          |                      | y6           | L      | 536.300915              | 698.394398  | 19.1       |      |
|          |                      | y5           | L      | 536.300915              | 584.351471  | 19.1       |      |
|          |                      | y7           | H      | 539.31098               | 801.467291  | 19.1       |      |
|          |                      | y6           | H      | 539.31098               | 704.414527  | 19.1       |      |
|          |                      | y5           | H      | 539.31098               | 590.3716    | 19.1       |      |
|          | ASGNLIPQEK           | y6           | L      | 528.787838              | 727.434866  | 18.9       |      |
|          |                      | y5           | L      | 528.787838              | 614.350802  | 18.9       |      |
|          |                      | y4           | L      | 528.787838              | 501.266738  | 18.9       |      |
|          |                      | y6           | H      | 531.797902              | 733.454995  | 18.9       |      |
|          |                      | y5           | H      | 531.797902              | 620.370931  | 18.9       |      |
|          |                      | y4           | H      | 531.797902              | 507.286867  | 18.9       |      |
| CYP2A6   | GTGGANIDPTFFLSR      | y9           | L      | 776.891354              | 1095.583322 | 26.4       |      |
|          |                      | y8           | L      | 776.891354              | 982.499258  | 26.4       |      |
|          |                      | y7           | L      | 776.891354              | 867.472314  | 26.4       |      |
|          |                      | y9           | H      | 779.901419              | 1101.603451 | 26.4       |      |
|          |                      | y8           | H      | 779.901419              | 988.519387  | 26.4       |      |
|          |                      | y7           | H      | 779.901419              | 873.492443  | 26.4       |      |
|          | DPSFFSNPQDFNPQHFLNEK | y11          | L      | 1204.550738             | 1388.65934  | 39.3       |      |
|          |                      | y10          | L      | 1204.550738             | 1273.632397 | 39.3       |      |
|          |                      | y8           | L      | 1204.550738             | 1012.521056 | 39.3       |      |
|          |                      | y11          | H      | 1207.560803             | 1394.679469 | 39.3       |      |
|          |                      | y10          | H      | 1207.560803             | 1279.652526 | 39.3       |      |
|          |                      | y8           | H      | 1207.560803             | 1018.541185 | 39.3       |      |
| CYP2B6   | GYGVIFANGNR          | y7           | L      | 584.298904              | 791.415862  | 20.6       |      |
|          |                      | y6           | L      | 584.298904              | 678.331798  | 20.6       |      |
|          |                      | y7           | H      | 587.308969              | 797.435991  | 20.6       |      |
|          |                      | y6           | H      | 587.308969              | 684.351927  | 20.6       |      |
|          | ETLDPSAPK            | y7           | L      | 479.248014              | 727.398481  | 17.4       |      |
|          |                      | y6           | L      | 479.248014              | 614.314417  | 17.4       |      |
|          |                      | y5           | L      | 479.248014              | 499.287474  | 17.4       |      |
|          |                      | y7           | H      | 482.258079              | 733.41861   | 17.4       |      |
|          |                      | y6           | H      | 482.258079              | 620.334546  | 17.4       |      |
|          |                      | y5           | H      | 482.258079              | 505.307603  | 17.4       |      |
|          | ETLDPSAPR            | y7           | L      | 493.251088              | 755.404629  | 17.8       |      |
|          |                      | y6           | L      | 493.251088              | 642.320565  | 17.8       |      |
|          |                      | y5           | L      | 493.251088              | 527.293622  | 17.8       |      |
|          |                      | y7           | H      | 496.261153              | 761.424758  | 17.8       |      |
|          |                      | y6           | H      | 496.261153              | 648.340694  | 17.8       |      |
|          |                      | y5           | H      | 496.261153              | 533.313751  | 17.8       |      |
|          | CYP2C8               | SFTNFASK     | y6     | L                       | 415.705785  | 743.372266 | 15.4 |
|          |                      |              | y5     | L                       | 415.705785  | 596.303852 | 15.4 |
| y4       |                      |              | L      | 415.705785              | 495.256174  | 15.4       |      |
| y6       |                      |              | H      | 418.71585               | 749.392395  | 15.4       |      |
| y5       |                      |              | H      | 418.71585               | 602.323981  | 15.4       |      |
| y4       |                      |              | H      | 418.71585               | 501.276303  | 15.4       |      |
| GNSPISQR |                      | y6           | L      | 429.725041              | 687.378414  | 15.9       |      |
|          |                      | y5           | L      | 429.725041              | 600.346386  | 15.9       |      |
|          |                      | y4           | L      | 429.725041              | 503.293622  | 15.9       |      |
|          |                      | y6           | H      | 432.735105              | 693.398543  | 15.9       |      |
|          |                      | y5           | H      | 432.735105              | 606.366515  | 15.9       |      |
|          |                      | y4           | H      | 432.735105              | 509.313751  | 15.9       |      |

Supplementary Table 1. Continued.

| Protein | Peptide sequence     | Fragment ion | H or L     | m/z (parent → fragment) |             | CE   |
|---------|----------------------|--------------|------------|-------------------------|-------------|------|
| CYP2C9  | LPPGPTPLPVIGNILQIGIK | y12          | L          | 1019.127168             | 1264.798734 | 33.7 |
|         |                      | y11          | L          | 1019.127168             | 1167.74597  | 33.7 |
|         |                      | y6           | L          | 1019.127168             | 671.445037  | 33.7 |
|         |                      | y12          | H          | 1022.137232             | 1270.818863 | 33.7 |
|         |                      | y11          | H          | 1022.137232             | 1173.766099 | 33.7 |
|         |                      | y6           | H          | 1022.137232             | 677.465166  | 33.7 |
|         | GIFPLAER             | y5           | L          | 451.758352              | 585.335487  | 16.5 |
|         |                      | y4           | L          | 451.758352              | 488.282723  | 16.5 |
|         |                      | y3           | L          | 451.758352              | 375.198659  | 16.5 |
|         |                      | y5           | H          | 454.768417              | 591.355616  | 16.5 |
| y4      |                      | H            | 454.768417 | 494.302852              | 16.5        |      |
| y3      |                      | H            | 454.768417 | 381.218788              | 16.5        |      |
| CYP2C18 | SLTNFSK              | y6           | L          | 398.71361               | 709.387916  | 14.9 |
|         |                      | y5           | L          | 398.71361               | 596.303852  | 14.9 |
|         |                      | y4           | L          | 398.71361               | 495.256174  | 14.9 |
|         |                      | y6           | H          | 401.723675              | 715.408045  | 14.9 |
|         |                      | y5           | H          | 401.723675              | 602.323981  | 14.9 |
|         |                      | y4           | H          | 401.723675              | 501.276303  | 14.9 |
|         | GSFPVAEK             | y6           | L          | 417.721435              | 690.382102  | 15.5 |
|         |                      | y5           | L          | 417.721435              | 543.313689  | 15.5 |
|         |                      | y4           | L          | 417.721435              | 446.260925  | 15.5 |
|         |                      | y6           | H          | 420.7315                | 696.402231  | 15.5 |
| y5      |                      | H            | 420.7315   | 549.333818              | 15.5        |      |
| y4      |                      | H            | 420.7315   | 452.281054              | 15.5        |      |
| CYP2C19 | IYGPVFTLYFGLER       | y11          | L          | 837.948141              | 1341.720149 | 28.2 |
|         |                      | y9           | L          | 837.948141              | 1145.598972 | 28.2 |
|         |                      | y8           | L          | 837.948141              | 998.530558  | 28.2 |
|         |                      | y7           | L          | 837.948141              | 897.482879  | 28.2 |
|         |                      | y11          | H          | 840.958205              | 1347.740278 | 28.2 |
|         |                      | y9           | H          | 840.958205              | 1151.619101 | 28.2 |
|         |                      | y8           | H          | 840.958205              | 1004.550687 | 28.2 |
|         |                      | y7           | H          | 840.958205              | 903.503008  | 28.2 |
|         | GHFPLAER             | y6           | L          | 463.745776              | 732.403901  | 16.9 |
|         |                      | y5           | L          | 463.745776              | 585.335487  | 16.9 |
|         |                      | y4           | L          | 463.745776              | 488.282723  | 16.9 |
|         |                      | y6           | H          | 466.755841              | 738.42403   | 16.9 |
|         |                      | y5           | H          | 466.755841              | 591.355616  | 16.9 |
|         |                      | y4           | H          | 466.755841              | 494.302852  | 16.9 |
| CYP2D6  | DIEVQGFR             | y6           | L          | 482.248349              | 735.378414  | 17.5 |
|         |                      | y4           | L          | 482.248349              | 507.267407  | 17.5 |
|         |                      | y3           | L          | 482.248349              | 379.208829  | 17.5 |
|         |                      | y6           | H          | 485.258413              | 741.398543  | 17.5 |
|         |                      | y4           | H          | 485.258413              | 513.287536  | 17.5 |
|         |                      | y3           | H          | 485.258413              | 385.228958  | 17.5 |
|         | AFLTQLDELLTEHR       | y5           | L          | 562.633421              | 655.352199  | 20.4 |
|         |                      | y4           | L          | 562.633421              | 542.268135  | 20.4 |
|         |                      | y2           | L          | 562.633421              | 312.177864  | 20.4 |
|         |                      | y5           | H          | 564.640131              | 661.372328  | 20.4 |
|         |                      | y4           | H          | 564.640131              | 548.288264  | 20.4 |
|         |                      | y2           | H          | 564.640131              | 318.197993  | 20.4 |

Supplementary Table 1. Continued.

| Protein | Peptide sequence | Fragment ion | H or L     | m/z (parent → fragment) |             | CE          |
|---------|------------------|--------------|------------|-------------------------|-------------|-------------|
| CYP2E1  | GIIFNNGPTWK      | y8           | L          | 623.83258               | 963.468292  | 21.8        |
|         |                  | y7           | L          | 623.83258               | 816.399878  | 21.8        |
|         |                  | y5           | L          | 623.83258               | 588.314023  | 21.8        |
|         |                  | y8           | H          | 626.842644              | 969.488421  | 21.8        |
|         |                  | y7           | H          | 626.842644              | 822.420007  | 21.8        |
|         |                  | y5           | H          | 626.842644              | 594.334152  | 21.8        |
|         | FITLVPSNLPHEATR  | y11          | L          | 847.964854              | 1220.638211 | 28.5        |
|         |                  | y10          | L          | 847.964854              | 1121.569797 | 28.5        |
|         |                  | y6           | L          | 847.964854              | 710.358013  | 28.5        |
|         |                  | y11          | H          | 850.974918              | 1226.65834  | 28.5        |
|         |                  | y10          | H          | 850.974918              | 1127.589926 | 28.5        |
|         |                  | y6           | H          | 850.974918              | 716.378142  | 28.5        |
| CYP2J2  | VIGQQQPSTAAR     | y9           | L          | 656.852032              | 915.464269  | 22.8        |
|         |                  | y7           | L          | 656.852032              | 730.384228  | 22.8        |
|         |                  | y6           | L          | 656.852032              | 602.32565   | 22.8        |
|         |                  | y9           | H          | 659.862097              | 921.484398  | 22.8        |
|         |                  | y7           | H          | 659.862097              | 736.404357  | 22.8        |
|         |                  | y6           | H          | 659.862097              | 608.345779  | 22.8        |
|         | FEYQDSWFQQLLK    | y9           | L          | 866.422487              | 1164.604785 | 29.1        |
|         |                  | y8           | L          | 866.422487              | 1049.577842 | 29.1        |
|         |                  | y9           | H          | 869.432552              | 1170.624914 | 29.1        |
|         |                  | y8           | H          | 869.432552              | 1055.597971 | 29.1        |
| CYP3A4  | EVTNFLR          | y6           | L          | 439.740159              | 749.43045   | 16.2        |
|         |                  | y5           | L          | 439.740159              | 650.362036  | 16.2        |
|         |                  | y4           | L          | 439.740159              | 549.314357  | 16.2        |
|         |                  | y6           | H          | 442.750224              | 755.450579  | 16.2        |
|         |                  | y5           | H          | 442.750224              | 656.382165  | 16.2        |
|         |                  | y4           | H          | 442.750224              | 555.334486  | 16.2        |
|         | LSLGLLQPEKPVVLK  | y10          | L          | 846.026923              | 1150.719421 | 28.5        |
|         |                  | y8           | L          | 846.026923              | 909.57678   | 28.5        |
|         |                  | y5           | L          | 846.026923              | 555.38646   | 28.5        |
|         |                  | y10          | H          | 849.036987              | 1156.73955  | 28.5        |
|         |                  | y8           | H          | 849.036987              | 915.596909  | 28.5        |
|         |                  | y5           | H          | 849.036987              | 561.406589  | 28.5        |
| CYP3A5  | DTINFLSK         | y6           | L          | 469.2531                | 721.424302  | 17.1        |
|         |                  | y5           | L          | 469.2531                | 608.340238  | 17.1        |
|         |                  | y2           | L          | 469.2531                | 234.144832  | 17.1        |
|         |                  | y6           | H          | 472.263164              | 727.444431  | 17.1        |
|         |                  | y5           | H          | 472.263164              | 614.360367  | 17.1        |
|         |                  | y2           | H          | 472.263164              | 240.164961  | 17.1        |
|         |                  | YWTEPEEFRPER | y8         | L                       | 819.880987  | 1059.521784 |
|         | y7               |              | L          | 819.880987              | 962.46902   | 27.7        |
|         | y6               |              | L          | 819.880987              | 833.426427  | 27.7        |
|         | y3               |              | L          | 819.880987              | 401.214309  | 27.7        |
|         | y8               |              | H          | 822.891051              | 1065.541913 | 27.7        |
|         | y7               |              | H          | 822.891051              | 968.489149  | 27.7        |
|         | y6               |              | H          | 822.891051              | 839.446556  | 27.7        |
|         | y3               | H            | 822.891051 | 407.234438              | 27.7        |             |

Supplementary Table 1. Continued.

| Protein | Peptide sequence | Fragment ion | H or L | m/z (parent → fragment) |             | CE   |
|---------|------------------|--------------|--------|-------------------------|-------------|------|
| CYP3A7  | FGLLLLTEKPIVLK   | y9           | L      | 764.479077              | 1040.671408 | 26   |
|         |                  | y8           | L      | 764.479077              | 927.587344  | 26   |
|         |                  | y9           | H      | 767.489141              | 1046.691537 | 26   |
|         |                  | y8           | H      | 767.489141              | 933.607473  | 26   |
|         | FNPLDPFVLSIK     | y10          | L      | 695.39247               | 1128.666323 | 23.9 |
|         |                  | y8           | L      | 695.39247               | 918.529495  | 23.9 |
|         |                  | y7           | L      | 695.39247               | 803.502552  | 23.9 |
|         |                  | y10          | H      | 698.402535              | 1134.686452 | 23.9 |
|         |                  | y8           | H      | 698.402535              | 924.549624  | 23.9 |
|         |                  | y7           | H      | 698.402535              | 809.522681  | 23.9 |
| CYP3A43 | DVTHFLK          | y5           | L      | 430.237253              | 645.371872  | 15.9 |
|         |                  | y4           | L      | 430.237253              | 544.324194  | 15.9 |
|         |                  | y5           | H      | 433.247317              | 651.392001  | 15.9 |
|         |                  | y4           | H      | 433.247317              | 550.344323  | 15.9 |
|         | YIPFGAGPR        | y7           | L      | 489.263802              | 701.372935  | 17.7 |
|         |                  | y6           | L      | 489.263802              | 604.320171  | 17.7 |
|         |                  | y7           | H      | 492.273866              | 707.393064  | 17.7 |
|         |                  | y6           | H      | 492.273866              | 610.3403    | 17.7 |
| CYP4F2  | HVTQDIVLPDGR     | y10          | L      | 675.362233              | 1113.589864 | 23.3 |
|         |                  | y6           | L      | 675.362233              | 656.3726    | 23.3 |
|         |                  | y4           | L      | 675.362233              | 444.220122  | 23.3 |
|         |                  | y10          | H      | 678.372297              | 1119.609993 | 23.3 |
|         |                  | y6           | H      | 678.372297              | 662.392729  | 23.3 |
|         |                  | y4           | H      | 678.372297              | 450.240251  | 23.3 |
|         | FDPENIK          | y6           | L      | 431.718893              | 715.362095  | 15.9 |
|         |                  | y5           | L      | 431.718893              | 600.335152  | 15.9 |
|         |                  | y4           | L      | 431.718893              | 503.282388  | 15.9 |
|         |                  | y6           | H      | 434.728957              | 721.382224  | 15.9 |
|         |                  | y5           | H      | 434.728957              | 606.355281  | 15.9 |
|         |                  | y4           | H      | 434.728957              | 509.302517  | 15.9 |
| UGT1A1  | TYPVPFQR         | y6           | L      | 504.269084              | 743.419885  | 18.1 |
|         |                  | y5           | L      | 504.269084              | 646.367121  | 18.1 |
|         |                  | y4           | L      | 504.269084              | 547.298707  | 18.1 |
|         |                  | y6           | H      | 507.279149              | 749.440014  | 18.1 |
|         |                  | y5           | H      | 507.279149              | 652.38725   | 18.1 |
|         |                  | y4           | H      | 507.279149              | 553.318836  | 18.1 |
|         | DGAFYTLK         | y6           | L      | 457.734543              | 742.413403  | 16.7 |
|         |                  | y5           | L      | 457.734543              | 671.376289  | 16.7 |
|         |                  | y4           | L      | 457.734543              | 524.307875  | 16.7 |
|         |                  | y6           | H      | 460.744607              | 748.433532  | 16.7 |
|         |                  | y5           | H      | 460.744607              | 677.396418  | 16.7 |
|         |                  | y4           | H      | 460.744607              | 530.328004  | 16.7 |



Supplementary Table 1. Continued.

| Protein | Peptide sequence      | Fragment ion | H or L | m/z (parent → fragment) |             | CE   |
|---------|-----------------------|--------------|--------|-------------------------|-------------|------|
| UGT1A3  | HVLGHTQLYFETEHFLK     | y10          | L      | 1050.038935             | 1326.672865 | 34.7 |
|         |                       | y9           | L      | 1050.038935             | 1213.588801 | 34.7 |
|         |                       | y8           | L      | 1050.038935             | 1050.525472 | 34.7 |
|         |                       | y10          | H      | 1053.049146             | 1332.692994 | 34.7 |
|         |                       | y9           | H      | 1053.049146             | 1219.60893  | 34.7 |
|         |                       | y8           | H      | 1053.049146             | 1056.545601 | 34.7 |
|         | YLSIPTVFFLR           | y7           | L      | 678.389731              | 879.5087    | 23.4 |
|         |                       | y6           | L      | 678.389731              | 782.455936  | 23.4 |
|         |                       | y5           | L      | 678.389731              | 681.408258  | 23.4 |
|         |                       | y7           | H      | 681.399795              | 885.528829  | 23.4 |
|         |                       | y6           | H      | 681.399795              | 788.476065  | 23.4 |
|         |                       | y5           | H      | 681.399795              | 687.428387  | 23.4 |
| UGT1A4  | YIPCDDLFK             | y7           | L      | 585.778624              | 894.40258   | 20.6 |
|         |                       | y6           | L      | 585.778624              | 797.349816  | 20.6 |
|         |                       | y5           | L      | 585.778624              | 637.319168  | 20.6 |
|         |                       | y7           | H      | 588.788689              | 900.422709  | 20.6 |
|         |                       | y6           | H      | 588.788689              | 803.369945  | 20.6 |
|         |                       | y5           | H      | 588.788689              | 643.339297  | 20.6 |
|         | GTQCPNPSSYIPK         | y9           | L      | 724.845558              | 1002.525472 | 24.8 |
|         |                       | y8           | L      | 724.845558              | 905.472708  | 24.8 |
|         |                       | y7           | L      | 724.845558              | 791.429781  | 24.8 |
|         |                       | y9           | H      | 727.855623              | 1008.545601 | 24.8 |
|         |                       | y8           | H      | 727.855623              | 911.492837  | 24.8 |
|         |                       | y7           | H      | 727.855623              | 797.44991   | 24.8 |
| UDP1A6  | VSVWLLR               | y6           | L      | 436.771263              | 773.466835  | 16.1 |
|         |                       | y5           | L      | 436.771263              | 686.434807  | 16.1 |
|         |                       | y4           | L      | 436.771263              | 587.366393  | 16.1 |
|         |                       | y6           | H      | 439.781327              | 779.486964  | 16.1 |
|         |                       | y4           | H      | 439.781327              | 593.386522  | 16.1 |
|         |                       | y3           | H      | 439.781327              | 407.307209  | 16.1 |
|         | SFLTAPQTEYR           | y8           | L      | 656.830234              | 965.468686  | 22.8 |
|         |                       | y7           | L      | 656.830234              | 864.421007  | 22.8 |
|         |                       | y6           | L      | 656.830234              | 793.383893  | 22.8 |
|         |                       | y8           | H      | 659.840299              | 971.488815  | 22.8 |
|         |                       | y7           | H      | 659.840299              | 870.441136  | 22.8 |
|         |                       | y6           | H      | 659.840299              | 799.404022  | 22.8 |
| UDP1A9  | AFAHAQWK              | y6           | L      | 479.748319              | 740.383834  | 17.4 |
|         |                       | y5           | L      | 479.748319              | 669.34672   | 17.4 |
|         |                       | y4           | L      | 479.748319              | 532.287808  | 17.4 |
|         |                       | y6           | H      | 482.758383              | 746.403963  | 17.4 |
|         |                       | y5           | H      | 482.758383              | 675.366849  | 17.4 |
|         |                       | y4           | H      | 482.758383              | 538.307937  | 17.4 |
|         | ESSFDAVFLDPFDNCGLIVAK | y13          | L      | 1172.561926             | 1461.740627 | 38.4 |
|         |                       | y12          | L      | 1172.561926             | 1348.656563 | 38.4 |
|         |                       | y11          | L      | 1172.561926             | 1233.62962  | 38.4 |
|         |                       | y13          | H      | 1175.57199              | 1467.760756 | 38.4 |
|         |                       | y12          | H      | 1175.57199              | 1354.676692 | 38.4 |
|         |                       | y11          | H      | 1175.57199              | 1239.649749 | 38.4 |

Supplementary Table 1. Continued.

| Protein | Peptide sequence         | Fragment ion | H or L | m/z (parent → fragment) |             | CE   |
|---------|--------------------------|--------------|--------|-------------------------|-------------|------|
| UDP2B4  | ANVIASALAK               | y8           | L      | 479.290016              | 772.492716  | 17.4 |
|         |                          | y7           | L      | 479.290016              | 673.424302  | 17.4 |
|         |                          | y6           | L      | 479.290016              | 560.340238  | 17.4 |
|         |                          | y8           | H      | 482.300081              | 778.512845  | 17.4 |
|         |                          | y7           | H      | 482.300081              | 679.444431  | 17.4 |
|         |                          | y6           | H      | 482.300081              | 566.360367  | 17.4 |
|         | FSPGYAIEK                | y7           | L      | 506.260925              | 777.414131  | 18.2 |
|         |                          | y6           | L      | 506.260925              | 680.361367  | 18.2 |
|         |                          | y5           | L      | 506.260925              | 623.339903  | 18.2 |
|         |                          | y7           | H      | 509.270989              | 783.43426   | 18.2 |
|         |                          | y6           | H      | 509.270989              | 686.381496  | 18.2 |
|         |                          | y5           | H      | 509.270989              | 629.360032  | 18.2 |
| UDP2B7  | TILDELIQR                | y7           | L      | 550.819138              | 886.499258  | 19.5 |
|         |                          | y6           | L      | 550.819138              | 773.415194  | 19.5 |
|         |                          | y5           | L      | 550.819138              | 658.38825   | 19.5 |
|         |                          | y7           | H      | 553.829203              | 892.519387  | 19.5 |
|         |                          | y6           | H      | 553.829203              | 779.435323  | 19.5 |
|         |                          | y5           | H      | 553.829203              | 664.408379  | 19.5 |
|         | ADVWLIR                  | y6           | L      | 436.75307               | 801.46175   | 16.1 |
|         |                          | y5           | L      | 436.75307               | 686.434807  | 16.1 |
|         |                          | y4           | L      | 436.75307               | 587.366393  | 16.1 |
|         |                          | y5           | H      | 439.763134              | 692.454936  | 16.1 |
|         |                          | y4           | H      | 439.763134              | 593.386522  | 16.1 |
|         |                          | y3           | H      | 439.763134              | 407.307209  | 16.1 |
| UDP2B10 | DTFWLPFSQEILWAINDIIR     | y10          | L      | 912.134027              | 1226.725569 | 29   |
|         |                          | y9           | L      | 912.134027              | 1113.641505 | 29   |
|         |                          | y8           | L      | 912.134027              | 1000.557441 | 29   |
|         |                          | y8           | H      | 914.140737              | 1006.57757  | 29   |
|         |                          | y7           | H      | 914.140737              | 820.498257  | 29   |
|         |                          | y6           | H      | 914.140737              | 749.461143  | 29   |
|         | GHEVTVLASSASILFDPNDSSTLK | y10          | L      | 830.090376              | 1123.526595 | 26.9 |
|         |                          | y9           | L      | 830.090376              | 976.458181  | 26.9 |
|         |                          | y8           | L      | 830.090376              | 861.431238  | 26.9 |
|         |                          | y10          | H      | 832.097085              | 1129.546724 | 26.9 |
|         |                          | y9           | H      | 832.097085              | 982.47831   | 26.9 |
|         |                          | y8           | H      | 832.097085              | 867.451367  | 26.9 |

Supplementary Table 1. Continued.

| Protein | Peptide sequence         | Fragment ion | H or L | m/z (parent → fragment) |             | CE   |
|---------|--------------------------|--------------|--------|-------------------------|-------------|------|
| UDP2B11 | DSFWLYFSQEILWELYDIFR     | y10          | L      | 976.469075              | 1367.7358   | 30.5 |
|         |                          | y9           | L      | 976.469075              | 1254.651735 | 30.5 |
|         |                          | y8           | L      | 976.469075              | 1141.567671 | 30.5 |
|         |                          | y10          | H      | 978.475785              | 1373.755929 | 30.5 |
|         |                          | y9           | H      | 978.475785              | 1260.671864 | 30.5 |
|         |                          | y8           | H      | 978.475785              | 1147.5878   | 30.5 |
|         | GHEVTVLASSASILFDPNDASTLK | y10          | L      | 824.758737              | 1107.53168  | 26.8 |
|         |                          | y9           | L      | 824.758737              | 960.463266  | 26.8 |
|         |                          | y8           | L      | 824.758737              | 845.436323  | 26.8 |
|         |                          | y10          | H      | 826.765447              | 1113.551809 | 26.8 |
|         |                          | y9           | H      | 826.765447              | 966.483395  | 26.8 |
|         |                          | y8           | H      | 826.765447              | 851.456452  | 26.8 |
| UDP2B15 | SVINDPVYK                | y7           | L      | 517.779482              | 848.451245  | 18.5 |
|         |                          | y6           | L      | 517.779482              | 735.367181  | 18.5 |
|         |                          | y4           | L      | 517.779482              | 506.29731   | 18.5 |
|         |                          | y7           | H      | 520.789546              | 854.471374  | 18.5 |
|         |                          | y6           | H      | 520.789546              | 741.38731   | 18.5 |
|         |                          | y4           | H      | 520.789546              | 512.317439  | 18.5 |
|         | WIYGVSK                  | y6           | L      | 426.734346              | 666.382102  | 15.8 |
|         |                          | y5           | L      | 426.734346              | 553.298038  | 15.8 |
|         |                          | y6           | H      | 429.74441               | 672.402231  | 15.8 |
|         |                          | y5           | H      | 429.74441               | 559.318167  | 15.8 |

## References

Rowland-Yeo K, Rostami-Hodjegan A, and Tucker GT (2004) Abundance of cytochrome P450 in human liver: a meta-analysis. *Br J Clin Pharmacol* **57**:687–688.

Shimada T, Yamazaki H, Mimura M, Inui Y, and Guengerich FP (1994) Interindividual variations in human liver cytochrome P-450 enzymes involved in the oxidation of drugs, carcinogens and toxic chemicals: studies with liver microsomes of 30 Japanese and 30 Caucasians. *J Pharmacol Exp Ther* **270**:414–423.
